# Supplementary material
Source: PubMed Central journal article supplement (PMC8514194)
Supplement: mmc1.pdf [file mmc1.pdf]

# THE LANCET HIV

## Supplementary appendix 1

This translation in Catalan was submitted by the authors and we reproduce it as supplied. It has not been peer reviewed. The Lancet's editorial processes have only been applied to the original in English, which should serve as reference for this manuscript.

Els autors van enviar aquesta traducció al català i la reproduïm tal com es proporciona. No ha estat revisat. Els processos editorials de Lancet només s'han aplicat a l'original en anglès, que hauria de servir de referència per a aquest manuscrit.

Supplement to: Nomah DK, Reyes-Urueña J, Díaz Y, et al. Sociodemographic, clinical, and immunological factors associated with SARS-CoV-2 diagnosis and severe COVID-19 outcomes in people living with HIV: a retrospective cohort study. *Lancet HIV* 2021; published online Oct 13. [http://dx.doi.org/10.1016/S2352-3018\(21\)00240-X](http://dx.doi.org/10.1016/S2352-3018(21)00240-X).

## **Factors sociodemogràfics, clínics i immunològics associats al diagnòstic del SARS-CoV-2 i resultats greus de COVID-19 en persones que viuen amb VIH: un estudi de cohort retrospectiu.**

### **Resum**

**Antecedents.** Els factors que afecten els resultats de la infecció per SARS-CoV-2 en persones que viuen amb el VIH no estan clars. Es van avaluar els factors associats al diagnòstic del SARS-CoV-2 i els resultats greus entre les persones que viuen amb el VIH.

**Mètodes.** Vam fer un estudi de cohort retrospectiu entre l'ús de dades de la cohort PISCIS de persones amb VIH a Catalunya (Espanya) entre l'1 de març i el 15 de desembre de 2020. Hem relacionat les dades de PISCIS amb els registres integrats d'atenció mèdica, clínica i de vigilància a través del Programa d'analítica de dades per a la recerca i la innovació en salut de Catalunya (PADRIS) per obtenir dades sobre el diagnòstic del SARS-CoV-2, les comorbiditats cròniques, així com els resultats clínics i de mortalitat. Els participants tenien almenys 16 anys d'edat de 16 hospitals de Catalunya. Els factors associats als diagnòstics de SARS-CoV-2 i els resultats greus es van avaluar mitjançant models de regressió de Cox univariats i multivariats. Es va estimar l'efecte de la immunosupressió en els resultats greus (ingrés hospitalari > 24 hores amb dispnea, taquipnea, hipoxaèmia, asfíxia o hiperventilació; o mort) utilitzant l'anàlisi de supervivència de Kaplan-Meier.

**Conclusions.** Hem vinculat 20 847 (72 · 8%) de 28 666 participants de la cohort PISCIS amb dades de PADRIS; 13 142 persones tenien el VIH. Un total de 749 (5 · 7%) persones amb VIH van ser diagnosticats amb SARS-CoV-2: la mitjana d'edat era de 43,5 anys (IQR 37 · 0-52 · 7), 131 (17,5%) eren dones i 618 (82 · 5%) eren homes. 103 persones amb VIH (13 · 8%) van ser hospitalitzades, set (0 · 9%) ingressades a unitats intensives i 13 (1 · 7%) van morir. El diagnòstic de SARS-CoV-2 va ser més freqüent entre els immigrants (relació de risc ajustada 1 · 55, IC del 95% 1 · 31-1 · 83), homes que tenen relacions sexuals amb homes (1 · 42, 1 · 09-1 · 86), i aquells amb quatre o més comorbiditats cròniques (1 · 46, 1 · 09-1 · 97). Edat mínima de 75 anys (5 · 2, 1 · 8-15 · 3), origen no espanyol (2 · 1, 1 · 3-3 · 4) i neuropsiquiàtric (1 · 69, 1 · 07-2 · 69), malaltia autoimmunitària (1 · 92, 1 · 14-3 · 23) malaltia respiratòria (1 · 84, 1 · 09-3 · 09) i malaltia metabòlica (2 · 59, 1 · 59-4 · 23) les comorbiditats cròniques es van associar amb un major risc de resultats greus. Un estimador de Kaplan-Meier va mostrar diferències en el risc de resultats greus segons el recompte de cèl·lules CD4 en pacients amb ARN detectable del VIH ( $p = 0 · 039$ ), però no es van observar diferències en pacients amb ARN VIH indetectable ( $p = 0 · 15$ ).

**Interpretació.** Les persones que viuen amb el VIH amb virèmia detectable del VIH, comorbiditats cròniques, algunes subpoblacions podrien tenir un augment de risc de resultats greus del COVID-19. Aquests grups haurien de tenir prioritat en els programes de gestió clínica i de vacunació contra el SARS-CoV-2.

**Finançament:** Fundació “la Caixa”.

Els autors van enviar aquesta traducció al català i la reproduïm tal com es proporciona. No ha estat revisat. Els processos editorials de Lancet només s'han aplicat a l'original en anglès, que hauria de servir de referència per a aquest manuscrit.
