# Supplementary material
Source: PubMed Central journal article supplement (PMC8514194)
Supplement: mmc2.pdf [file mmc2.pdf]

# THE LANCET HIV

## Supplementary appendix 2

This translation in Spanish was submitted by the authors and we reproduce it as supplied. It has not been peer reviewed. *The Lancet's* editorial processes have only been applied to the original in English, which should serve as reference for this manuscript.

Los autores nos proporcionaron esta traducción al español y la reproducimos tal como nos fue entregada. No la hemos revisado. Los procesos editoriales de *The Lancet* se han aplicado únicamente al original en inglés, que debe servir de referencia para este manuscrito.

Supplement to: Nomah DK, Reyes-Urueña J, Díaz Y, et al. Sociodemographic, clinical, and immunological factors associated with SARS-CoV-2 diagnosis and severe COVID-19 outcomes in people living with HIV: a retrospective cohort study. *Lancet HIV* 2021; published online Oct 13. [http://dx.doi.org/10.1016/S2352-3018\(21\)00240-X](http://dx.doi.org/10.1016/S2352-3018(21)00240-X).

## Resumen

**Introducción:** Los factores que afectan los resultados de la infección por SARS-CoV-2 en personas que viven con el VIH (PVH) no están claros. Nosotros evaluamos los factores asociados con el diagnóstico de SARS-CoV-2 y el mal pronóstico del COVID-19 entre las PVH.

**Métodos:** Estudio de cohorte retrospectivo usando los datos de la cohorte PISCIS de PVH en Cataluña (España) entre el 1 de marzo y el 15 de diciembre de 2020. Vinculamos los datos de PISCIS con registros integrados de atención sanitaria, clínica y de vigilancia a través del Programa de Análisis de Datos Públicos para la Investigación e Innovación en Salud de Cataluña (PADRIS) para obtener datos sobre el diagnóstico del SARS-CoV-2, las comorbilidades crónicas, así como los resultados clínicos y de mortalidad. Las personas en seguimiento eran >16 años en seguimiento en uno de los 16 hospitales de Cataluña. Los factores asociados con los diagnósticos de SARS-CoV-2 y los resultados graves se evaluaron mediante modelos de regresión de Cox univariados y multivariados. Estimamos el efecto de la inmunosupresión sobre los resultados graves (ingreso hospitalario durante >24 h con disnea, taquipnea, hipoxemia, asfisia o hiperventilación; o muerte) mediante el análisis de supervivencia de Kaplan-Meier.

**Resultados:** Del total de pacientes en seguimiento en la cohorte PISCIS (n=28.666), 20.847 (72,8%) fueron vinculados con datos de PADRIS; 13142 eran PVH, de las cuales 749 (5,7%) fueron diagnosticadas con SARS-CoV-2: mediana de edad de 43,5 años (IQR 37,0-52,7), 131 (17,5%) eran mujeres y 618 (82 ± 5%) hombres. 103 (13 ± 8%) fueron hospitalizadas, siete (0 ± 9%) ingresaron en cuidados intensivos y 13 (1 ± 7%) murieron. El diagnóstico de SARS-CoV-2 fue más común entre los migrantes (hazard ratio ajustado 1,55, IC del 95% 1,31–1,83), hombres que tienen sexo con hombres (1,42; 1,09–1,86) y aquellos con cuatro o más comorbilidades crónicas (1,46; 1,09–1,97). Tener al menos 75 años (5,2; 1,8-15,3), origen no español (2,1; 1,3–3,4) y diagnóstico de enfermedad neuropsiquiátrica (1,69; 1,07-2,69), de enfermedad autoinmune (1,92; 1,14–3,23) de enfermedad respiratoria (1,84; 1,09–3,09) o de enfermedad metabólica (2,59; 1,59–4,23) se asociaron con un mayor riesgo de resultados graves de COVID-19. El estimador de Kaplan-Meier mostró diferencias en el riesgo de tener resultados graves por COVID-19 según el recuento de células CD4 en pacientes con ARN-VIH detectable (p=0,039), pero no se observaron diferencias en pacientes con ARN-VIH indetectable (p=0,15).

**Interpretación:** Las personas que viven con el VIH con RNA-VIH detectable, comorbilidades crónicas y algunas subpoblaciones podrían tener un mayor riesgo de resultados graves por COVID-19. Estos grupos deben tener prioridad en el manejo clínico y los programas de vacunación contra el SARS-CoV-2.

**Financiación:** Fundació “la Caixa”

Esta traducción en Español ha sido enviada por los autores y la reproducimos tal como se suministra. No ha sido revisada por pares. Los procesos editoriales de The Lancet solo se han aplicado al original en inglés, que debe servir como referencia para este manuscrito.
