# Supplementary material
Source: PubMed Central journal article supplement (PMC8514194)
Supplement: mmc3.pdf [file mmc3.pdf]

# THE LANCET HIV

## Supplementary appendix 3

This translation in Russian was submitted by the authors and we reproduce it as supplied. It has not been peer reviewed. *The Lancet's* editorial processes have only been applied to the original in English, which should serve as reference for this manuscript.

Этот перевод на русский язык был предоставлен авторами, и мы воспроизводим его в том виде, в котором он был предоставлен. Этот перевод не был рецензирован. Редакционные процессы журнала *The Lancet* были применены только к оригиналу на английском языке, который служит ссылкой для этой статьи.

Supplement to: Nomah DK, Reyes-Urueña J, Díaz Y, et al. Sociodemographic, clinical, and immunological factors associated with SARS-CoV-2 diagnosis and severe COVID-19 outcomes in people living with HIV: a retrospective cohort study. *Lancet HIV* 2021; published online Oct 13. [http://dx.doi.org/10.1016/S2352-3018\(21\)00240-X](http://dx.doi.org/10.1016/S2352-3018(21)00240-X).

## **Социально-демографические, клинические и иммунологические факторы, связанные с диагнозом SARS-CoV-2 и тяжелыми исходами COVID-19 у людей, живущих с ВИЧ: ретроспективное когортное исследование**

### **Резюме**

**Введение:** Факторы, влияющие на исходы инфекции SARS-CoV-2 у людей, живущих с ВИЧ, неясны. Мы оценили факторы, связанные с диагнозом SARS-CoV-2 и тяжелыми исходами среди людей, живущих с ВИЧ.

**Методы:** Мы провели ретроспективное когортное исследование с использованием данных когорты PISCIS людей с ВИЧ в Каталонии (Испания) в период с 1 марта по 15 декабря 2020 года. Мы связали данные PISCIS с интегрированными реестрами здравоохранения, клинических исследований и эпиднадзора с помощью Программы анализа общедоступных данных для исследований и инноваций в области здравоохранения в Каталонии (PADRIS) для получения данных о диагнозе SARS-CoV-2, хронических сопутствующих заболеваниях, а также клинических результатах и смертности. Участники в возрасте не менее 16 лет находились на лечении в 16 больницах в Каталонии. Факторы, связанные с диагнозами SARS-CoV-2 и тяжелыми исходами, оценивались с использованием одномерных и многомерных регрессионных моделей Кокса. Мы оценили влияние иммуносупрессии на тяжелые исходы (госпитализация в течение > 24 ч с одышкой, тахипноэ, гипоксемией, асфиксией или гипервентиляцией или смертью) с использованием анализа выживаемости Каплана-Мейера.

**Выводы:** Мы связали 20 847 (72·8%) из 28 666 участников когорты PISCIS с данными ПАРИЖА; 13 142 человека имели ВИЧ. 749 (5·7%) людям с ВИЧ был поставлен диагноз SARS-CoV-2: их средний возраст составил 43·5 лет (IQR 37·0-52·7), 131 (17·5%) были женщины, и 618 (82·5%) были мужчинами. 103 человека с ВИЧ (13·8%) были госпитализированы, семь (0·9%) госпитализированы в отделение интенсивной терапии и 13 (1·7%) умерли. Диагноз SARS-CoV-2 чаще встречался среди мигрантов (скорректированный коэффициент риска 1·55, 95% ДИ 1·31-1·83), мужчин, имеющих половые контакты с мужчинами (1·42, 1·09-1·86), и те, у кого четыре или более хронических сопутствующих заболеваний (1·46, 1·09-1·97). Возраст не менее 75 лет (5·2, 1·8-15·3), не испанского происхождения (2·1, 1·3-3·4), и психоневрологический (1·69, 1·07-2·69), аутоиммунное заболевание (1·92, 1·14-3·23) респираторные заболевания (1·84, 1·09-3·09), и метаболические заболевания (2·59, 1·59-4·23) хронические сопутствующие заболевания были связаны с повышенным риском тяжелых исходов. Оценка Каплана-Мейера показала различия в риске тяжелых исходов по количеству клеток CD4 у пациентов с обнаруживаемой РНК ВИЧ ( $p=0·039$ ), но различий не наблюдалось у пациентов с необнаруживаемой РНК ВИЧ ( $p=0·15$ ).

**Интерпретация:** Люди, живущие с ВИЧ, с обнаруживаемой вирусемией ВИЧ, хроническими сопутствующими заболеваниями и некоторыми субпопуляциями, могут подвергаться повышенному риску тяжелых исходов COVID-19. Этим группам следует уделять приоритетное внимание в программах клинического ведения и вакцинации против SARS-CoV-2.

**Финансирование:** Fundació “la Caixa”.

Этот перевод на русский язык был представлен авторами, и мы воспроизводим его в том виде, в каком он был предоставлен. Она не была подвергнута экспертной оценке. Редакционные процедуры "Ланцета" были применены только к оригиналу на английском языке, который должен служить ссылкой для этой рукописи.
